# Supplementary material for: Reduced vocal variability in a zebra finch model of dopamine depletion: implications for Parkinson disease
Source: PubMed Central journal article supplement (PMC4673629; doi:10.14814/phy2.12599), 2015-11-12

Supplemental Figure 1B

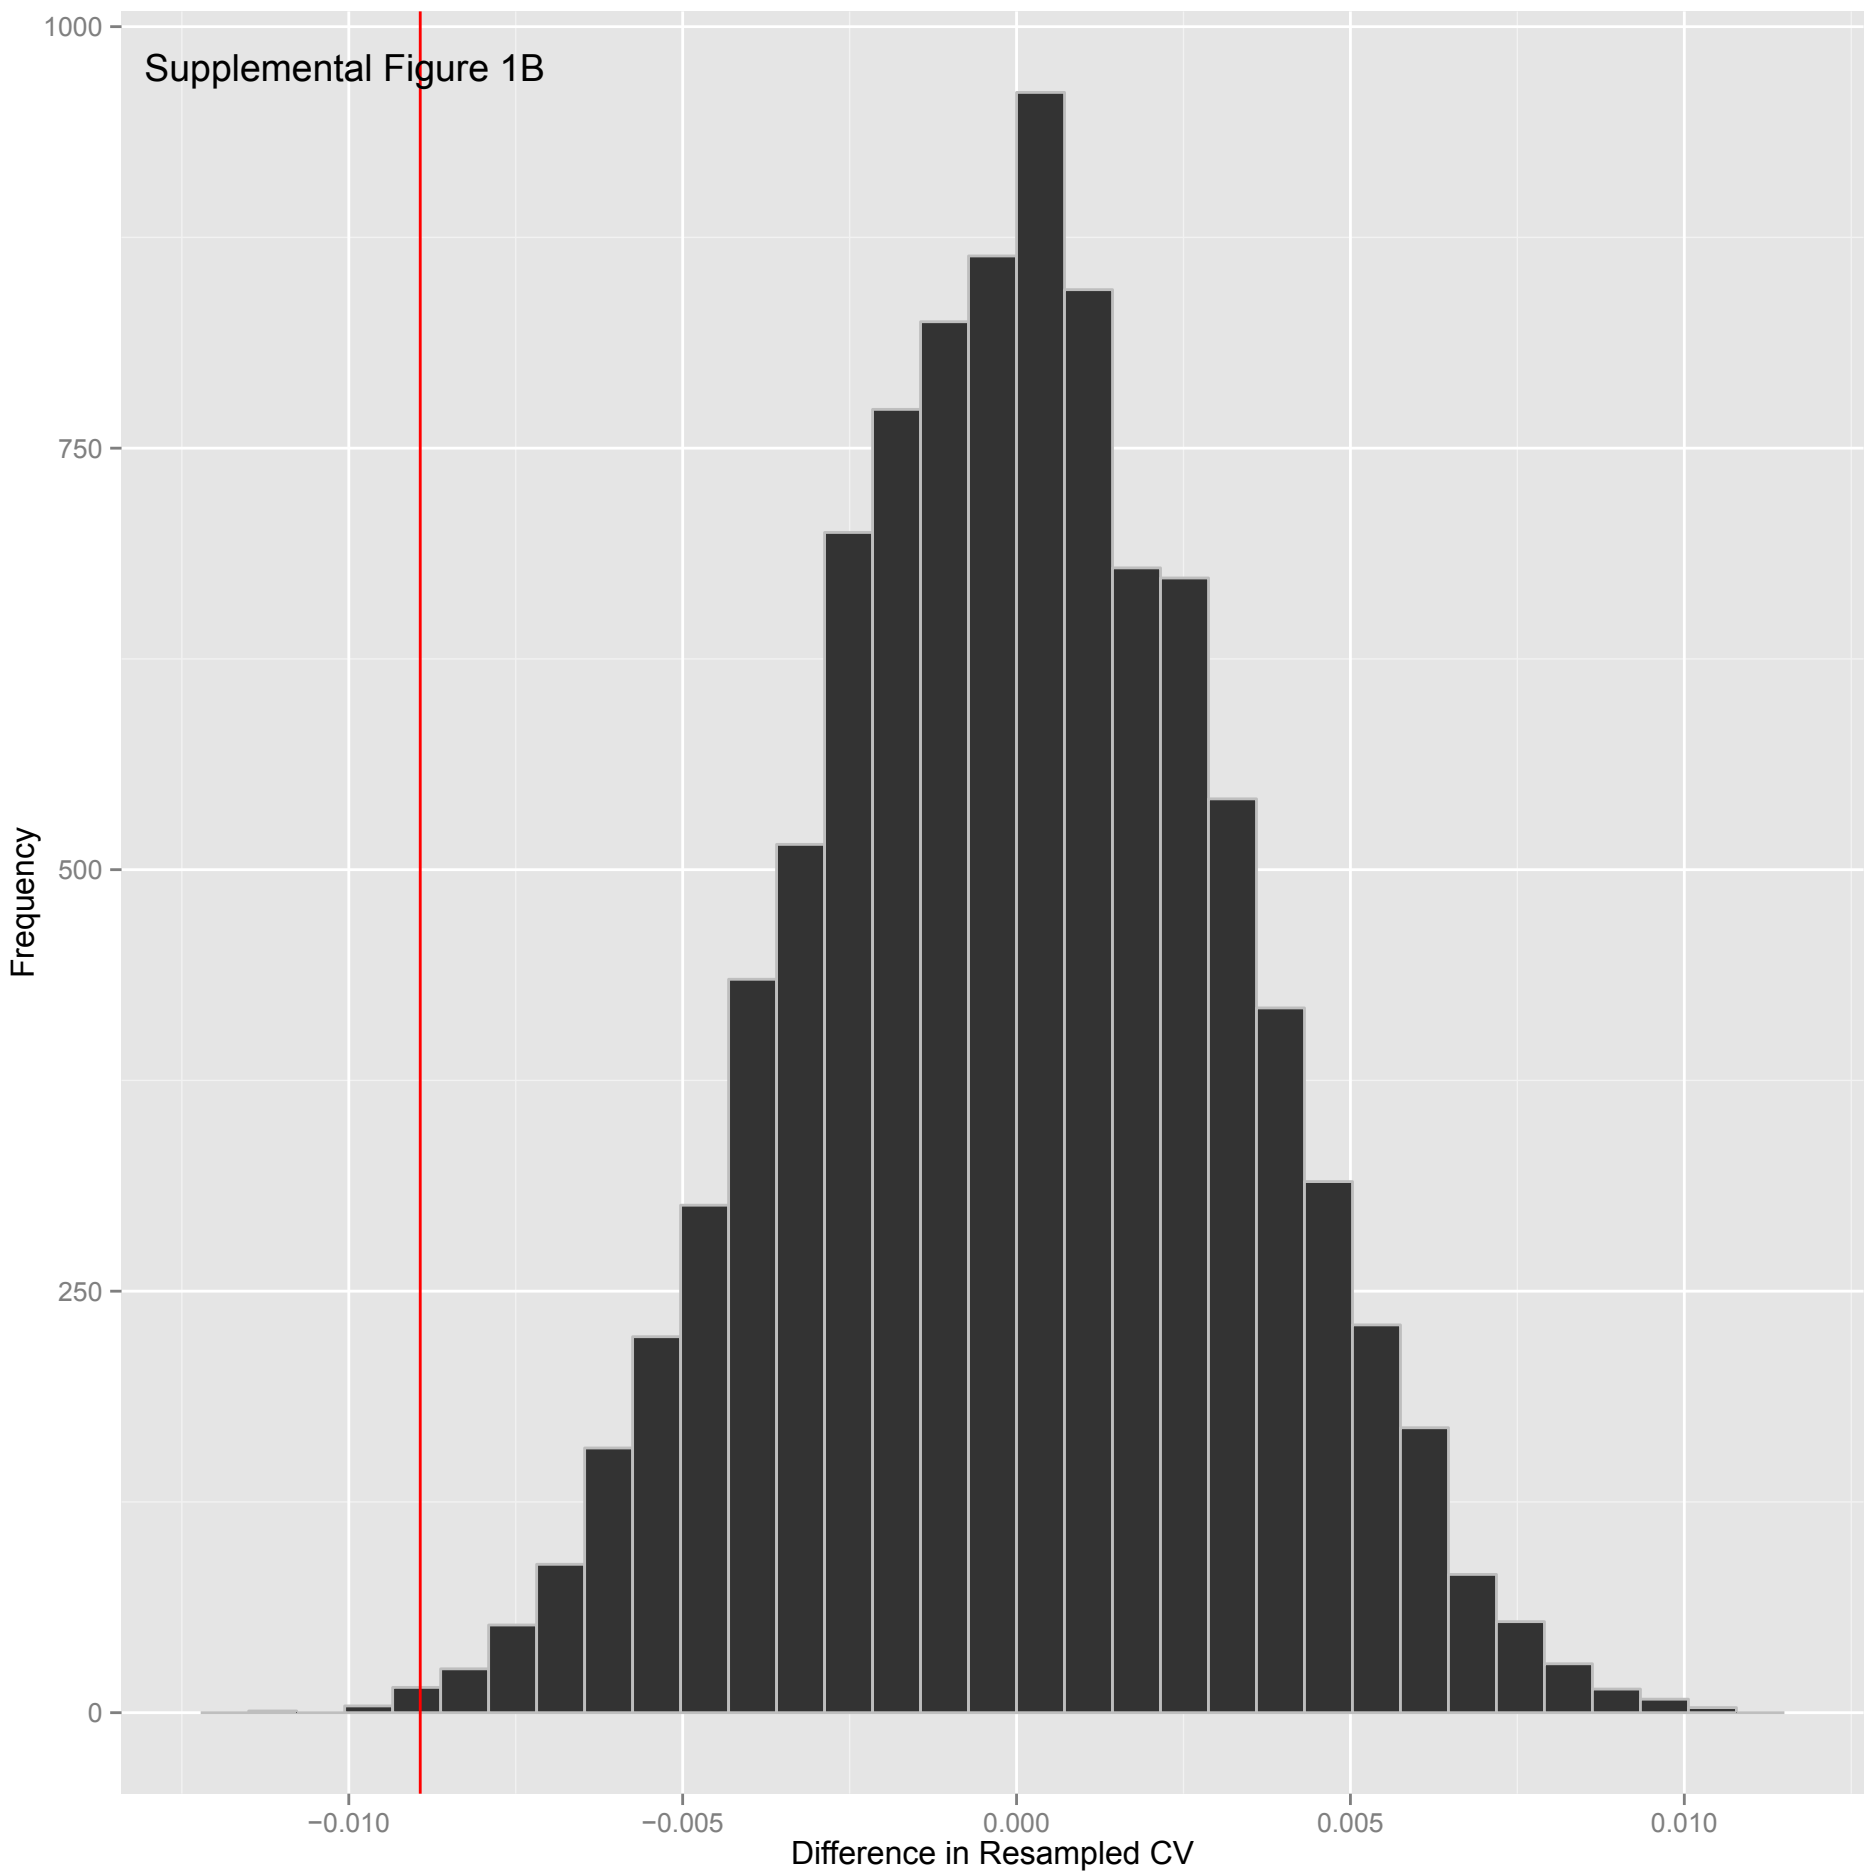

Supplement: phy20003-e12599-sd4.pdf [file phy20003-e12599-sd4.pdf]
