# Supplementary material for: Reduced vocal variability in a zebra finch model of dopamine depletion: implications for Parkinson disease
Source: PubMed Central journal article supplement (PMC4673629; doi:10.14814/phy2.12599), 2015-11-12

# FD 6-OHDA

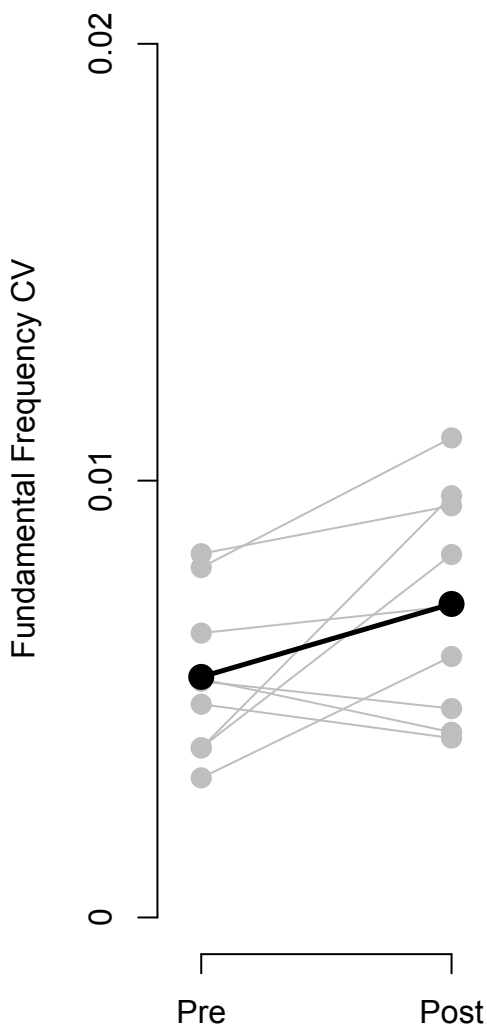

Supplement: phy20003-e12599-sd6.pdf [file phy20003-e12599-sd6.pdf]
